# Supplementary material for: Development and evaluation of a droplet digital PCR assay for the diagnosis of paucibacillary leprosy in skin biopsy specimens
Source: PubMed Central journal article supplement (PMC6438576; doi:10.1371/journal.pntd.0007284), 2019-03-18
Supplement: pntd.0007284.s001.pdf [file pntd.0007284.s001.pdf]

**S1 Table. Sequences of primers and probes for qPCR and ddPCR.**

| Name               | Oligo sequences 5' to 3'      |                          |                                     | Product Size (bp) | TM | References |
|--------------------|-------------------------------|--------------------------|-------------------------------------|-------------------|----|------------|
|                    | Forward primer                | Reverse primer           | Taqman probe                        |                   |    |            |
| <b>RLEP</b>        | GCAGCAGTATCGTGTTAGTG<br>AA    | CGCTAGAAGGTTGCCGTAT      | FAM-CGCCGACGGCCGGATCATCGA-MGB       | 73                | 60 | [1,2]      |
| <b>HSP18</b>       | CGATCGGGAAATGCTTGC            | CGAGAACCAGCTGACGATTG     | FAM-ACACCGCGTGGCCGCTCG-MGB          | 62                | 62 | [3]        |
| <b>16SrRNA</b>     | GCATGTCTTGTGGTGGAAAG<br>C     | CACCCACCAACAAGCTGAT      | FAM-CATCCTGCACCGCA-MGB              | 71                | 71 | [2]        |
| <b>esxA</b>        | CGTTTCAGCCGAGTGATTGA          | CCGAGGGAATAAACCATGCA     | FAM-TGCTTGCACCAGGTCGCCA-MGB         | 62                | 62 | [3]        |
| <b>Ag85B</b>       | GTGCACGGCAGCAACCTAA           | TCGGCATTGAGGTTGAACAC     | FAM-TTCCAGGACGCCTACAACGGTGCT-MGB    | 80                | 60 | [4]        |
| <b>sodA</b>        | CACCCTGCCGATTTGG              | CTTGGTGTGGTGGATCTCGTT    | FAM-ACTACGCAGCGCTGGAACCACATATCT-MGB | 82                | 60 | [2]        |
| <b>pra</b>         | CACACCGTCGTCATGATCTT<br>G     | CCGCTGTGGGACTCCAAA       | FAM-CGCCAGGGTTTGC-MGB               | 54                | 60 | [5,6]      |
| <b>groEL</b>       | GCCGGGTGCAGCAGTATC            | CCGACGGCCGGATCA          | FAM-TGTTAGTGAACAGTGCATCG-MGB        | 63                | 60 | [7]        |
| <b>rpoT</b>        | TGACTACGTCGTCGTCCTCG<br>A     | TGAGCCCAGCGAGGACAT       | FAM-AGACCGAGGTCGGC-MGB              | 80                | 60 | [8]        |
| <b>ML2179</b>      | ACGCTCGCGTATGTCAAAAA          | TCAACCTAGCCAATTTATCGATGA | FAM-ATTTTGACCCATCGTTATAT-MGB        | 68                | 58 | [9]        |
| <b>ML1545</b>      | CTCCGTCTCCGTCTTGCT            | GGCTCCCTTGGGATGGTTT      | FAM-ACTGTGAAATAGTTCATGCGG-MGB       | 61                | 60 | [9,10]     |
| <b>ML0098</b>      | TCGCTGCGGCCGTACTAC            | TGAAAGCGACCGGAATATCC     | FAM-AACCGCTGGCAACG-MGB              | 111               | 60 | [4]        |
| <b>ML0024</b>      | GGTGCACGATCACGATGGT           | TCCGGTTTGTGTCGAAAG       | FAM-TCGATTCCCTGGCAGAT-MGB           | 57                | 60 | [11]       |
| <b>MntH</b>        | ACCCGCTTGGACGTCATC            | TCGCCGATTACGATTCC        | FAM-TGGCGATGACGATCG-MGB             | 55                | 58 | [12]       |
| <b>AT repeats</b>  | CGGGTTGGCGCTTCTG              | CGCCCATCACCTAGCTTT       | FAM-TATGGCTGCGCAGTTG-MGB            | 57                | 60 | [12,13]    |
| <b>AGT repeats</b> | TCAACGCTGCGGTTTCG             | CCTTGGCAGGCGGTGAT        | FAM-TAGTCGCGCAGATGC-MGB             | 59                | 58 | [12,13]    |
| <b>TTC repeats</b> | CGGGAATAAGTTTAGCATTG<br>AAGAA | TCCGTTGGGTTTCGATCGA      | FAM-AGAACTCGCCGATGTC-MGB            | 124               | 60 | [12,13]    |

## References:

1. Moher D, Liberati A, Tetzlaff J, Altman DG, Group P. Preferred reporting items for systematic reviews and meta-analyses: the PRISMA statement. *BMJ*. 2009;339: b2535. doi: 10.1136/bmj.b2535.
2. Yan W, Xing Y, Yuan LC, De Yang R, Tan FY, Zhang Y, et al. Application of RLEP real-time PCR for detection of *M. leprae* DNA in paraffin-embedded skin biopsy specimens for diagnosis of paucibacillary leprosy. *Am J Trop Med Hyg*. 2014;90(3): 524-529. doi: 10.4269/ajtmh.13-0659.
3. Davis GL, Ray NA, Lahiri R, Gillis TP, Krahenbuhl JL, Williams DL, et al. Molecular assays for determining *Mycobacterium leprae* viability in tissues of experimentally infected mice. *PLoS Negl Trop Dis*. 2013;7(8): e2404. doi: 10.1371/journal.pntd.0002404.
4. Martinez AN, Britto CF, Nery JA, Sampaio EP, Jardim MR, Sarno EN, et al. Evaluation of real-time and conventional PCR targeting complex 85 genes for detection of *Mycobacterium leprae* DNA in skin biopsy samples from patients diagnosed with leprosy. *J Clin Microbiol*. 2006;44(9): 3154-3159. doi: 10.1128/JCM.02250-05.
5. Caleffi KR, Hirata RD, Hirata MH, Caleffi ER, Siqueira VL, Cardoso RF. Use of the polymerase chain reaction to detect *Mycobacterium leprae* in urine. *Braz J Med Biol Res*. 2012;45(2): 153-157.
6. Arunagiri K, Sangeetha G, Sugashini PK, Balaraman S, Showkath Ali MK. Nasal PCR assay for the detection of *Mycobacterium leprae* pra gene to study subclinical infection in a community. *Microb Pathog*. 2017;104: 336-339. doi: 10.1016/j.micpath.2017.01.046.
7. Qinxue W, Xinyu L, Wei H, Tao L, Yaoping Y, Jinping Z, et al. A study on PCR for detecting infection with *M. leprae*. *Chin Med Sci J*. 1999;14(4): 237-241.
8. Turankar RP, Pandey S, Lavania M, Singh I, Nigam A, Darlong J, et al. Comparative evaluation of PCR amplification of RLEP, 16S rRNA, rpoT and Sod A gene targets for detection of *M. leprae* DNA from clinical and environmental samples. *Int J Mycobacteriol*. 2015;4(1): 54-59. doi: 10.1016/j.ijmyco.2014.11.062.
9. Chaitanya VS, Cuello L, Das M, Sudharsan A, Ganesan P, Kanmani K, et al. Analysis of a novel multiplex polymerase chain reaction assay as a sensitive tool for the diagnosis of indeterminate and tuberculoid forms of leprosy. *Int J Mycobacteriol*. 2017;6(1): 1-8. doi: 10.4103/2212-5531.201885.
10. Sundeep Chaitanya V, Das M, Eisenbach TL, Amoako A, Rajan L, Horo I, et al. *Mycobacterium leprae* specific genomic target in the promoter region of probable 4-alpha-glucanotransferase (ML1545) gene with potential sensitivity for polymerase chain reaction based diagnosis of leprosy. *Int J Mycobacteriol*. 2016;5(2): 135-141. doi: 10.1016/j.ijmyco.2016.01.002.

11. da Silva Martinez T, Nahas AA, Figueira MM, Costa AV, Goncalves MA, Goulart LR, et al. Oral lesion in leprosy: borderline tuberculoid diagnosis based on detection of *Mycobacterium leprae* DNA by qPCR. *Acta Derm Venereol.* 2011;91(6): 704-707. doi: 10.2340/00015555-1175.
12. Cruz AF, Furini RB, Roselino AM. Comparison between microsatellites and *MtH* gene as targets to identify *Mycobacterium leprae* by PCR in leprosy. *An Bras Dermatol.* 2011;86(4): 651-656.
13. Young SK, Taylor GM, Jain S, Suneetha LM, Suneetha S, Lockwood DN, et al. Microsatellite mapping of *Mycobacterium leprae* populations in infected humans. *J Clin Microbiol.* 2004;42(11): 4931-4936. doi: 10.1128/JCM.42.11.4931-4936.2004.
