# Supplementary material for: Development and evaluation of a droplet digital PCR assay for the diagnosis of paucibacillary leprosy in skin biopsy specimens
Source: PubMed Central journal article supplement (PMC6438576; doi:10.1371/journal.pntd.0007284), 2019-03-18
Supplement: pntd.0007284.s002.pdf [file pntd.0007284.s002.pdf]

**S2 Table. Ct values of all target genes in serial dilutions of 5 MB clinical samples.**

| Target gene    | 1:10  |                 | 1:100 |      | 1:200 |      | 1:1000 |      | 1:2000 |      | 1:10000         |      |
|----------------|-------|-----------------|-------|------|-------|------|--------|------|--------|------|-----------------|------|
|                | Mean  | CV <sup>a</sup> | Mean  | CV   | Mean  | CV   | Mean   | CV   | Mean   | CV   | Mean            | CV   |
| <b>RLEP</b>    | 26.12 | 0.01            | 29.58 | 0.01 | 30.71 | 0.02 | 33.43  | 0.02 | 34.48  | 0.01 | 36.75           | 0.02 |
| <b>groEL</b>   | 29.06 | 0.01            | 32.82 | 0.01 | 33.65 | 0.01 | 36.22  | 0.01 | 37.59  | 0.01 | ND <sup>b</sup> | -    |
| <b>pra</b>     | 30.97 | 0.01            | 34.61 | 0.01 | 35.40 | 0.01 | 38.29  | 0.01 | 38.45  | 0.01 | ND              | -    |
| <b>esxA</b>    | 31.27 | 0.01            | 34.80 | 0.01 | 35.93 | 0.01 | 38.25  | 0.01 | 38.39  | 0.01 | ND              | -    |
| <b>HSP18</b>   | 31.58 | 0.01            | 35.07 | 0.01 | 36.23 | 0.02 | 38.94  | 0.01 | 39.14  | 0.01 | ND              | -    |
| <b>85B</b>     | 32.07 | 0.01            | 35.67 | 0.01 | 36.86 | 0.02 | 38.98  | 0.01 | 39.42  | 0.00 | ND              | -    |
| <b>rpoT</b>    | 32.17 | 0.01            | 35.76 | 0.01 | 36.61 | 0.02 | 39.01  | 0.01 | ND     | -    | ND              | -    |
| <b>ML0024</b>  | 32.29 | 0.01            | 35.93 | 0.01 | 37.07 | 0.01 | 38.66  | 0.00 | ND     | -    | ND              | -    |
| <b>ML1545</b>  | 32.42 | 0.01            | 36.07 | 0.01 | 37.08 | 0.01 | 39.09  | 0.01 | ND     | -    | ND              | -    |
| <b>ML2179</b>  | 32.61 | 0.01            | 36.23 | 0.01 | 37.63 | 0.01 | 39.28  | 0.01 | ND     | -    | ND              | -    |
| <b>sodA</b>    | 33.08 | 0.01            | 36.85 | 0.01 | 38.00 | 0.01 | 39.37  | 0.01 | ND     | -    | ND              | -    |
| <b>16SrRNA</b> | 33.09 | 0.01            | 36.94 | 0.01 | 37.72 | 0.01 | ND     | -    | ND     | -    | ND              | -    |
| <b>TTC</b>     | 33.37 | 0.01            | 37.41 | 0.02 | 38.29 | 0.01 | ND     | -    | ND     | -    | ND              | -    |
| <b>ML0098</b>  | 33.42 | 0.01            | 37.02 | 0.01 | 38.03 | 0.02 | ND     | -    | ND     | -    | ND              | -    |
| <b>AT</b>      | 33.49 | 0.01            | 37.21 | 0.01 | 38.16 | 0.01 | ND     | -    | ND     | -    | ND              | -    |
| <b>MntH</b>    | 37.35 | 0.01            | ND    | -    | ND    | -    | ND     | -    | ND     | -    | ND              | -    |
| <b>AGT</b>     | ND    | -               | ND    | -    | ND    | -    | ND     | -    | ND     | -    | ND              | -    |

The sensitivities of 17 target genes were assessed by qPCR using a series of normalized DNA samples from MB patients.

<sup>a</sup>CV = Coefficient of variation.

<sup>b</sup>ND = Not detected.
