# Supplementary material for: Development and evaluation of a droplet digital PCR assay for the diagnosis of paucibacillary leprosy in skin biopsy specimens
Source: PubMed Central journal article supplement (PMC6438576; doi:10.1371/journal.pntd.0007284), 2019-03-18
Supplement: pntd.0007284.s003.pdf [file pntd.0007284.s003.pdf]

**S3 Table. No. of positive events for 59 control cases.**

| Number | RLEP |   |      | groEL |   |      |
|--------|------|---|------|-------|---|------|
|        | 1    | 2 | Mean | 1     | 2 | Mean |
| 1      | 0    | 0 | 0    | 0     | 0 | 0    |
| 2      | 0    | 1 | 0.5  | 0     | 1 | 0.5  |
| 3      | 1    | 0 | 0.5  | 0     | 0 | 0    |
| 4      | 2    | 0 | 1    | 0     | 1 | 0.5  |
| 5      | 0    | 1 | 0.5  | 0     | 0 | 0    |
| 6      | 0    | 2 | 1    | 0     | 0 | 0    |
| 7      | 2    | 1 | 1.5  | 0     | 1 | 0.5  |
| 8      | 0    | 0 | 0    | 0     | 0 | 0    |
| 9      | 1    | 2 | 1.5  | 0     | 1 | 0.5  |
| 10     | 0    | 1 | 0.5  | 3     | 3 | 3    |
| 11     | 2    | 0 | 1    | 4     | 1 | 2.5  |
| 12     | 0    | 1 | 0.5  | 1     | 0 | 0.5  |
| 13     | 2    | 0 | 1    | 1     | 1 | 1    |
| 14     | 0    | 0 | 0    | 0     | 0 | 0    |
| 15     | 0    | 0 | 0    | 1     | 0 | 0.5  |
| 16     | 0    | 0 | 0    | 0     | 1 | 0.5  |
| 17     | 0    | 0 | 0    | 1     | 0 | 0.5  |
| 18     | 0    | 0 | 0    | 1     | 1 | 1    |
| 19     | 1    | 0 | 0.5  | 2     | 1 | 1.5  |
| 20     | 0    | 0 | 0    | 0     | 1 | 0.5  |
| 21     | 0    | 0 | 0    | 0     | 0 | 0    |
| 22     | 0    | 0 | 0    | 0     | 0 | 0    |
| 23     | 0    | 0 | 0    | 1     | 0 | 0.5  |
| 24     | 0    | 0 | 0    | 0     | 0 | 0    |
| 25     | 0    | 0 | 0    | 1     | 0 | 0.5  |
| 26     | 0    | 0 | 0    | 1     | 2 | 1.5  |
| 27     | 0    | 0 | 0    | 1     | 1 | 1    |
| 28     | 1    | 0 | 0.5  | 0     | 0 | 0    |
| 29     | 0    | 0 | 0    | 0     | 0 | 0    |
| 30     | 0    | 0 | 0    | 0     | 0 | 0    |
| 31     | 0    | 0 | 0    | 0     | 0 | 0    |
| 32     | 0    | 0 | 0    | 1     | 1 | 1    |
| 33     | 0    | 0 | 0    | 0     | 0 | 0    |
| 34     | 0    | 0 | 0    | 0     | 1 | 0.5  |
| 35     | 0    | 0 | 0    | 0     | 1 | 0.5  |
| 36     | 0    | 0 | 0    | 0     | 0 | 0    |
| 37     | 0    | 0 | 0    | 0     | 1 | 0.5  |
| 38     | 0    | 0 | 0    | 0     | 1 | 0.5  |
| 39     | 0    | 0 | 0    | 0     | 0 | 0    |
| 40     | 0    | 0 | 0    | 1     | 0 | 0.5  |
| 41     | 0    | 0 | 0    | 0     | 1 | 0.5  |

|    |   |   |     |   |   |     |
|----|---|---|-----|---|---|-----|
| 42 | 0 | 0 | 0   | 0 | 0 | 0   |
| 43 | 0 | 0 | 0   | 0 | 0 | 0   |
| 44 | 0 | 0 | 0   | 0 | 1 | 0.5 |
| 45 | 0 | 0 | 0   | 1 | 0 | 0.5 |
| 46 | 0 | 0 | 0   | 2 | 1 | 1.5 |
| 47 | 0 | 3 | 1.5 | 0 | 0 | 0   |
| 48 | 0 | 0 | 0   | 4 | 1 | 2.5 |
| 49 | 0 | 0 | 0   | 2 | 1 | 1.5 |
| 50 | 0 | 0 | 0   | 0 | 0 | 0   |
| 51 | 1 | 0 | 0.5 | 0 | 1 | 0.5 |
| 52 | 0 | 0 | 0   | 0 | 0 | 0   |
| 53 | 0 | 0 | 0   | 0 | 0 | 0   |
| 54 | 1 | 2 | 1.5 | 0 | 0 | 0   |
| 55 | 2 | 0 | 1   | 0 | 0 | 0   |
| 56 | 4 | 0 | 2   | 0 | 0 | 0   |
| 57 | 2 | 0 | 1   | 0 | 0 | 0   |
| 58 | 0 | 4 | 2   | 1 | 0 | 0.5 |
| 59 | 0 | 0 | 0   | 0 | 1 | 0.5 |

---
