# Supplementary material for: Development and evaluation of a droplet digital PCR assay for the diagnosis of paucibacillary leprosy in skin biopsy specimens
Source: PubMed Central journal article supplement (PMC6438576; doi:10.1371/journal.pntd.0007284), 2019-03-18

**STARD flow diagram: qPCR**

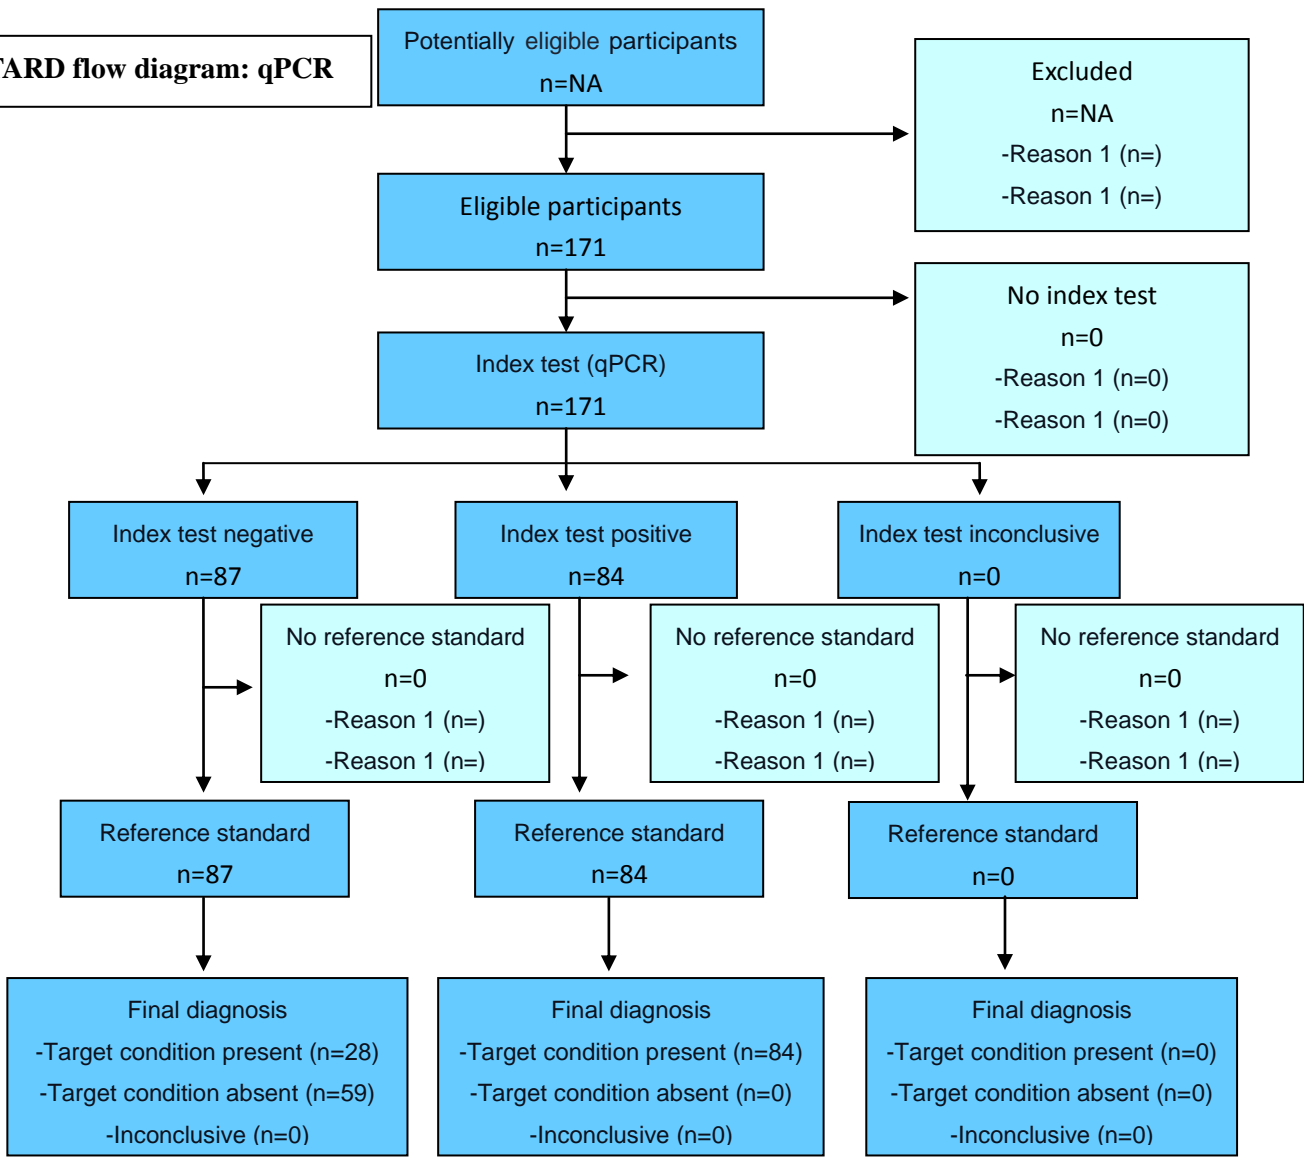

Supplement: pntd.0007284.s006.pdf [file pntd.0007284.s006.pdf]
